# Supplementary material for: Graphenylene and inorganic graphenylene nanopores for gas-phase 4He/3He separation: kinetic and steady-state considerations
Source: Royal Society of Chemistry journal article supplement (doi:10.1039/d0cp05755j), 2021-01-01
Supplement: d0cp05755j1.pdf [file d0cp05755j1.pdf]

## SUPPORTING INFORMATION

**Table S1:** The potential energy points for the motion of helium along the z-axis,  $V(z)$ , for GP and IGP, computed using  $\omega$ B97X-D3(BJ)/def2-TZVP, DLPNO-CCSD/ cc-pVTZ, DLPNO-CCSD/aug-cc-pVTZ and DLPNO-CCSD/CBS levels of computation.

| $z / \text{\AA}$ | $V(z) / \text{eV} \text{ --- GP}$ |                    |                        |                | $V(z) / \text{eV} \text{ --- IGP}$ |                    |                        |                |
|------------------|-----------------------------------|--------------------|------------------------|----------------|------------------------------------|--------------------|------------------------|----------------|
|                  | $\omega$ B97X-D3(BJ)/def2-TZVP    | DLPNO-CCSD/cc-pVTZ | DLPNO-CCSD/aug-cc-pVTZ | DLPNO-CCSD/CBS | $\omega$ B97X-D3(BJ)/def2-TZVP     | DLPNO-CCSD/cc-pVTZ | DLPNO-CCSD/aug-cc-pVTZ | DLPNO-CCSD/CBS |
| -7.0             | 0.0000                            | 0.0000             | 0.0000                 | 0.0000         | 0.0000                             | 0.0000             | 0.0000                 | 0.0000         |
| -6.8             | -0.0001                           | 0.0000             | 0.0000                 | 0.0000         | 0.0000                             | -0.0001            | 0.0000                 | 0.0000         |
| -6.6             | -0.0002                           | -0.0001            | -0.0001                | -0.0001        | -0.0001                            | -0.0001            | -0.0001                | 0.0000         |
| -6.4             | -0.0003                           | -0.0002            | -0.0002                | -0.0002        | -0.0003                            | -0.0002            | -0.0002                | -0.0001        |
| -6.2             | -0.0004                           | -0.0002            | -0.0002                | -0.0002        | -0.0005                            | -0.0002            | -0.0002                | -0.0001        |
| -6.0             | -0.0006                           | -0.0003            | -0.0003                | -0.0003        | -0.0006                            | -0.0003            | -0.0003                | -0.0002        |
| -5.8             | -0.0008                           | -0.0004            | -0.0004                | -0.0004        | -0.0007                            | -0.0003            | -0.0004                | -0.0003        |
| -5.6             | -0.0012                           | -0.0005            | -0.0005                | -0.0005        | -0.0007                            | -0.0004            | -0.0005                | -0.0003        |
| -5.4             | -0.0016                           | -0.0006            | -0.0006                | -0.0005        | -0.0008                            | -0.0005            | -0.0006                | -0.0004        |
| -5.2             | -0.0022                           | -0.0007            | -0.0007                | -0.0007        | -0.0011                            | -0.0006            | -0.0007                | -0.0005        |
| -5.0             | -0.0030                           | -0.0009            | -0.0009                | -0.0009        | -0.0015                            | -0.0008            | -0.0009                | -0.0005        |
| -4.8             | -0.0040                           | -0.0010            | -0.0010                | -0.0012        | -0.0022                            | -0.0008            | -0.0010                | -0.0007        |
| -4.6             | -0.0052                           | -0.0012            | -0.0012                | -0.0017        | -0.0032                            | -0.0009            | -0.0012                | -0.0009        |
| -4.4             | -0.0067                           | -0.0014            | -0.0017                | -0.0026        | -0.0043                            | -0.0009            | -0.0019                | -0.0012        |
| -4.2             | -0.0083                           | -0.0017            | -0.0026                | -0.0038        | -0.0057                            | -0.0011            | -0.0030                | -0.0020        |
| -4.0             | -0.0102                           | -0.0021            | -0.0040                | -0.0055        | -0.0073                            | -0.0014            | -0.0047                | -0.0030        |
| -3.8             | -0.0122                           | -0.0027            | -0.0059                | -0.0078        | -0.0088                            | -0.0020            | -0.0069                | -0.0047        |
| -3.6             | -0.0145                           | -0.0036            | -0.0085                | -0.0106        | -0.0108                            | -0.0029            | -0.0100                | -0.0069        |
| -3.4             | -0.0171                           | -0.0048            | -0.0119                | -0.0141        | -0.0135                            | -0.0044            | -0.0138                | -0.0101        |
| -3.2             | -0.0201                           | -0.0064            | -0.0161                | -0.0181        | -0.0171                            | -0.0065            | -0.0179                | -0.0151        |
| -3.0             | -0.0233                           | -0.0080            | -0.0200                | -0.0218        | -0.0211                            | -0.0088            | -0.0221                | -0.0202        |
| -2.8             | -0.0269                           | -0.0100            | -0.0233                | -0.0249        | -0.0256                            | -0.0112            | -0.0255                | -0.0245        |
| -2.6             | -0.0305                           | -0.0114            | -0.0252                | -0.0271        | -0.0301                            | -0.0132            | -0.0278                | -0.0280        |

|      |         |         |         |         |         |         |         |         |
|------|---------|---------|---------|---------|---------|---------|---------|---------|
| -2.4 | -0.0340 | -0.0112 | -0.0252 | -0.0276 | -0.0341 | -0.0145 | -0.0288 | -0.0298 |
| -2.2 | -0.0367 | -0.0093 | -0.0229 | -0.0264 | -0.0373 | -0.0148 | -0.0277 | -0.0308 |
| -2.0 | -0.0380 | -0.0057 | -0.0189 | -0.0234 | -0.0393 | -0.0139 | -0.0254 | -0.0299 |
| -1.8 | -0.0371 | -0.0007 | -0.0139 | -0.0188 | -0.0396 | -0.0115 | -0.0211 | -0.0265 |
| -1.6 | -0.0335 | 0.0063  | -0.0070 | -0.0122 | -0.0380 | -0.0074 | -0.0148 | -0.0212 |
| -1.4 | -0.0258 | 0.0162  | 0.0023  | -0.0031 | -0.0335 | -0.0011 | -0.0079 | -0.0130 |
| -1.2 | -0.0145 | 0.0286  | 0.0139  | 0.0083  | -0.0262 | 0.0073  | 0.0010  | -0.0041 |
| -1.0 | -0.0020 | 0.0419  | 0.0269  | 0.0211  | -0.0168 | 0.0174  | 0.0112  | 0.0059  |
| -0.8 | 0.0097  | 0.0549  | 0.0415  | 0.0356  | -0.0047 | 0.0296  | 0.0227  | 0.0164  |
| -0.6 | 0.0206  | 0.0669  | 0.0551  | 0.0492  | 0.0074  | 0.0418  | 0.0346  | 0.0276  |
| -0.4 | 0.0299  | 0.0766  | 0.0657  | 0.0596  | 0.0174  | 0.0530  | 0.0443  | 0.0370  |
| -0.2 | 0.0368  | 0.0833  | 0.0721  | 0.0658  | 0.0241  | 0.0623  | 0.0511  | 0.0438  |
| 0.0  | 0.0401  | 0.0863  | 0.0747  | 0.0682  | 0.0270  | 0.0663  | 0.0537  | 0.0465  |
| 0.2  | 0.0368  | 0.0833  | 0.0721  | 0.0658  | 0.0241  | 0.0623  | 0.0511  | 0.0438  |
| 0.4  | 0.0299  | 0.0766  | 0.0657  | 0.0596  | 0.0174  | 0.0530  | 0.0443  | 0.0370  |
| 0.6  | 0.0206  | 0.0669  | 0.0551  | 0.0492  | 0.0074  | 0.0418  | 0.0346  | 0.0276  |
| 0.8  | 0.0097  | 0.0549  | 0.0415  | 0.0356  | -0.0047 | 0.0296  | 0.0227  | 0.0164  |
| 1.0  | -0.0020 | 0.0419  | 0.0269  | 0.0211  | -0.0168 | 0.0174  | 0.0112  | 0.0059  |
| 1.2  | -0.0145 | 0.0286  | 0.0139  | 0.0083  | -0.0262 | 0.0073  | 0.0010  | -0.0041 |
| 1.4  | -0.0258 | 0.0162  | 0.0023  | -0.0031 | -0.0335 | -0.0011 | -0.0079 | -0.0130 |
| 1.6  | -0.0335 | 0.0063  | -0.0070 | -0.0122 | -0.0380 | -0.0074 | -0.0148 | -0.0212 |
| 1.8  | -0.0371 | -0.0007 | -0.0139 | -0.0188 | -0.0396 | -0.0115 | -0.0211 | -0.0265 |
| 2.0  | -0.0380 | -0.0057 | -0.0189 | -0.0234 | -0.0393 | -0.0139 | -0.0254 | -0.0299 |
| 2.2  | -0.0367 | -0.0093 | -0.0229 | -0.0264 | -0.0373 | -0.0148 | -0.0277 | -0.0308 |
| 2.4  | -0.0340 | -0.0112 | -0.0252 | -0.0276 | -0.0341 | -0.0145 | -0.0288 | -0.0298 |
| 2.6  | -0.0305 | -0.0114 | -0.0252 | -0.0271 | -0.0301 | -0.0132 | -0.0278 | -0.0280 |
| 2.8  | -0.0269 | -0.0100 | -0.0233 | -0.0249 | -0.0256 | -0.0112 | -0.0255 | -0.0245 |
| 3.0  | -0.0233 | -0.0080 | -0.0200 | -0.0218 | -0.0211 | -0.0088 | -0.0221 | -0.0202 |
| 3.2  | -0.0201 | -0.0064 | -0.0161 | -0.0181 | -0.0171 | -0.0065 | -0.0179 | -0.0151 |
| 3.4  | -0.0171 | -0.0048 | -0.0119 | -0.0141 | -0.0135 | -0.0044 | -0.0138 | -0.0101 |
| 3.6  | -0.0145 | -0.0036 | -0.0085 | -0.0106 | -0.0108 | -0.0029 | -0.0100 | -0.0069 |



**Table S2:** The potential energy points for the motion of helium in the pore plane,  $V(x,y)$ , for GP and IGP, obtained using the DLPNO-CCSD/CBS level of computation.

| $x$ (Å) | $y$ (Å) | $V(x,y)$ / eV |        |
|---------|---------|---------------|--------|
|         |         | GP            | IGP    |
| -1.0    | -1.0    | 4.3033        | 4.6571 |
| -0.9    | -1.0    | 3.1167        | 2.9177 |
| -0.8    | -1.0    | 2.2100        | 1.9980 |
| -0.7    | -1.0    | 1.6813        | 1.5577 |
| -0.6    | -1.0    | 1.3664        | 1.3468 |
| -0.5    | -1.0    | 1.2583        | 1.3014 |
| -0.4    | -1.0    | 1.3664        | 1.3468 |
| -0.3    | -1.0    | 1.6813        | 1.5577 |
| -0.2    | -1.0    | 2.2100        | 1.9980 |
| -0.1    | -1.0    | 3.1167        | 2.9177 |
| 0.0     | -1.0    | 4.3033        | 4.6571 |
| 0.1     | -1.0    | 2.9533        | 3.2831 |
| 0.2     | -1.0    | 1.9548        | 1.9652 |
| 0.3     | -1.0    | 1.2275        | 1.1833 |
| 0.4     | -1.0    | 0.8712        | 0.8357 |
| 0.5     | -1.0    | 0.6767        | 0.6679 |
| 0.6     | -1.0    | 0.5989        | 0.6125 |
| 0.7     | -1.0    | 0.6767        | 0.6679 |
| 0.8     | -1.0    | 0.8712        | 0.8357 |
| 0.9     | -1.0    | 1.2275        | 1.1833 |
| 1.0     | -1.0    | 1.9548        | 1.9652 |
| -1.0    | -0.9    | 2.9533        | 3.2831 |
| -0.9    | -0.9    | 2.1000        | 2.3033 |
| -0.8    | -0.9    | 1.2514        | 1.3011 |

|      |      |        |        |
|------|------|--------|--------|
| -0.7 | -0.9 | 0.7238 | 0.7355 |
| -0.6 | -0.9 | 0.4572 | 0.4561 |
| -0.5 | -0.9 | 0.2932 | 0.2926 |
| -0.4 | -0.9 | 0.2523 | 0.2569 |
| -0.3 | -0.9 | 0.2932 | 0.2926 |
| -0.2 | -0.9 | 0.4572 | 0.4561 |
| -0.1 | -0.9 | 0.7238 | 0.7355 |
| 0.0  | -0.9 | 1.2514 | 1.3011 |
| 0.1  | -0.9 | 2.1000 | 2.3033 |
| 0.2  | -0.9 | 1.6100 | 1.6578 |
| 0.3  | -0.9 | 0.8604 | 0.8835 |
| 0.4  | -0.9 | 0.4430 | 0.4575 |
| 0.5  | -0.9 | 0.2287 | 0.2346 |
| 0.6  | -0.9 | 0.1109 | 0.1125 |
| 0.7  | -0.9 | 0.0944 | 0.0958 |
| 0.8  | -0.9 | 0.1109 | 0.1125 |
| 0.9  | -0.9 | 0.2287 | 0.2346 |
| 1.0  | -0.9 | 0.4430 | 0.4575 |
| -1.0 | -0.8 | 0.8604 | 0.8835 |
| -0.9 | -0.8 | 1.6100 | 1.6578 |
| -0.8 | -0.8 | 1.3456 | 1.3132 |
| -0.7 | -0.8 | 0.6761 | 0.6679 |
| -0.6 | -0.8 | 0.3121 | 0.3183 |
| -0.5 | -0.8 | 0.1259 | 0.1303 |
| -0.4 | -0.8 | 0.0437 | 0.0451 |
| -0.3 | -0.8 | 0.0236 | 0.0235 |
| -0.2 | -0.8 | 0.0437 | 0.0451 |
| -0.1 | -0.8 | 0.1259 | 0.1303 |
| 0.0  | -0.8 | 0.3121 | 0.3183 |

|      |      |        |        |
|------|------|--------|--------|
| 0.1  | -0.8 | 0.6761 | 0.6679 |
| 0.2  | -0.8 | 1.3456 | 1.3132 |
| 0.3  | -0.8 | 1.2015 | 1.1732 |
| 0.4  | -0.8 | 0.6028 | 0.5896 |
| 0.5  | -0.8 | 0.2742 | 0.2783 |
| 0.6  | -0.8 | 0.0940 | 0.0981 |
| 0.7  | -0.8 | 0.0199 | 0.0205 |
| 0.8  | -0.8 | 0.0000 | 0.0000 |
| 0.9  | -0.8 | 0.0199 | 0.0205 |
| 1.0  | -0.8 | 0.0940 | 0.0981 |
| -1.0 | -0.7 | 0.2742 | 0.2783 |
| -0.9 | -0.7 | 0.6028 | 0.5896 |
| -0.8 | -0.7 | 1.2015 | 1.1732 |
| -0.7 | -0.7 | 1.3132 | 1.3132 |
| -0.6 | -0.7 | 0.6679 | 0.6679 |
| -0.5 | -0.7 | 0.3183 | 0.3183 |
| -0.4 | -0.7 | 0.1303 | 0.1303 |
| -0.3 | -0.7 | 0.0451 | 0.0451 |
| -0.2 | -0.7 | 0.0235 | 0.0235 |
| -0.1 | -0.7 | 0.0451 | 0.0451 |
| 0.0  | -0.7 | 0.1303 | 0.1303 |
| 0.1  | -0.7 | 0.3183 | 0.3183 |
| 0.2  | -0.7 | 0.6679 | 0.6679 |
| 0.3  | -0.7 | 1.3132 | 1.3132 |
| 0.4  | -0.7 | 1.6578 | 1.6578 |
| 0.5  | -0.7 | 0.8835 | 0.8835 |
| 0.6  | -0.7 | 0.4575 | 0.4575 |
| 0.7  | -0.7 | 0.2346 | 0.2346 |
| 0.8  | -0.7 | 0.1125 | 0.1125 |

|      |      |        |        |
|------|------|--------|--------|
| 0.9  | -0.7 | 0.0958 | 0.0958 |
| 1.0  | -0.7 | 0.1125 | 0.1125 |
| -1.0 | -0.6 | 0.2346 | 0.2346 |
| -0.9 | -0.6 | 0.4575 | 0.4575 |
| -0.8 | -0.6 | 0.8835 | 0.8835 |
| -0.7 | -0.6 | 1.6578 | 1.6578 |
| -0.6 | -0.6 | 2.3033 | 2.3033 |
| -0.5 | -0.6 | 1.3011 | 1.3011 |
| -0.4 | -0.6 | 0.7355 | 0.7355 |
| -0.3 | -0.6 | 0.4561 | 0.4561 |
| -0.2 | -0.6 | 0.2926 | 0.2926 |
| -0.1 | -0.6 | 0.2569 | 0.2569 |
| 0.0  | -0.6 | 0.2926 | 0.2926 |
| 0.1  | -0.6 | 0.4561 | 0.4561 |
| 0.2  | -0.6 | 0.7355 | 0.7355 |
| 0.3  | -0.6 | 1.3011 | 1.3011 |
| 0.4  | -0.6 | 2.3033 | 2.3033 |
| 0.5  | -0.6 | 3.2831 | 3.2831 |
| 0.6  | -0.6 | 1.9652 | 1.9652 |
| 0.7  | -0.6 | 1.1833 | 1.1833 |
| 0.8  | -0.6 | 0.8357 | 0.8357 |
| 0.9  | -0.6 | 0.6679 | 0.6679 |
| 1.0  | -0.6 | 0.6125 | 0.6125 |
| -1.0 | -0.5 | 0.6679 | 0.6679 |
| -0.9 | -0.5 | 0.8357 | 0.8357 |
| -0.8 | -0.5 | 1.1833 | 1.1833 |
| -0.7 | -0.5 | 1.9652 | 1.9652 |
| -0.6 | -0.5 | 3.2831 | 3.2831 |
| -0.5 | -0.5 | 4.6571 | 4.6571 |

|      |      |        |        |
|------|------|--------|--------|
| -0.4 | -0.5 | 2.9177 | 2.9177 |
| -0.3 | -0.5 | 1.9980 | 1.9980 |
| -0.2 | -0.5 | 1.5577 | 1.5577 |
| -0.1 | -0.5 | 1.3468 | 1.3468 |
| 0.0  | -0.5 | 1.3014 | 1.3014 |
| 0.1  | -0.5 | 1.3468 | 1.3468 |
| 0.2  | -0.5 | 1.5577 | 1.5577 |
| 0.3  | -0.5 | 1.9980 | 1.9980 |
| 0.4  | -0.5 | 2.9177 | 2.9177 |
| 0.5  | -0.5 | 4.6571 | 4.6571 |
| 0.6  | -0.5 | 4.3033 | 4.6571 |
| 0.7  | -0.5 | 3.1167 | 2.9177 |
| 0.8  | -0.5 | 2.2100 | 1.9980 |
| 0.9  | -0.5 | 1.6813 | 1.5577 |
| 1.0  | -0.5 | 1.3664 | 1.3468 |
| -1.0 | -0.4 | 1.2583 | 1.3014 |
| -0.9 | -0.4 | 1.3664 | 1.3468 |
| -0.8 | -0.4 | 1.6813 | 1.5577 |
| -0.7 | -0.4 | 2.2100 | 1.9980 |
| -0.6 | -0.4 | 3.1167 | 2.9177 |
| -0.5 | -0.4 | 4.3033 | 4.6571 |
| -0.4 | -0.4 | 2.9533 | 3.2831 |
| -0.3 | -0.4 | 1.9548 | 1.9652 |
| -0.2 | -0.4 | 1.2275 | 1.1833 |
| -0.1 | -0.4 | 0.8712 | 0.8357 |
| 0.0  | -0.4 | 0.6767 | 0.6679 |
| 0.1  | -0.4 | 0.5989 | 0.6125 |
| 0.2  | -0.4 | 0.6767 | 0.6679 |
| 0.3  | -0.4 | 0.8712 | 0.8357 |



|      |      |        |        |
|------|------|--------|--------|
| 0.4  | -0.4 | 1.2275 | 1.1833 |
| 0.5  | -0.4 | 1.9548 | 1.9652 |
| 0.6  | -0.4 | 2.9533 | 3.2831 |
| 0.7  | -0.4 | 2.1000 | 2.3033 |
| 0.8  | -0.4 | 1.2514 | 1.3011 |
| 0.9  | -0.4 | 0.7238 | 0.7355 |
| 1.0  | -0.4 | 0.4572 | 0.4561 |
| -1.0 | -0.3 | 0.2932 | 0.2926 |
| -0.9 | -0.3 | 0.2523 | 0.2569 |
| -0.8 | -0.3 | 0.2932 | 0.2926 |
| -0.7 | -0.3 | 0.4572 | 0.4561 |
| -0.6 | -0.3 | 0.7238 | 0.7355 |
| -0.5 | -0.3 | 1.2514 | 1.3011 |
| -0.4 | -0.3 | 2.1000 | 2.3033 |
| -0.3 | -0.3 | 1.6100 | 1.6578 |
| -0.2 | -0.3 | 0.8604 | 0.8835 |
| -0.1 | -0.3 | 0.4430 | 0.4575 |
| 0.0  | -0.3 | 0.2287 | 0.2346 |
| 0.1  | -0.3 | 0.1109 | 0.1125 |
| 0.2  | -0.3 | 0.0944 | 0.0958 |
| 0.3  | -0.3 | 0.1109 | 0.1125 |
| 0.4  | -0.3 | 0.2287 | 0.2346 |
| 0.5  | -0.3 | 0.4430 | 0.4575 |
| 0.6  | -0.3 | 0.8604 | 0.8835 |
| 0.7  | -0.3 | 1.6100 | 1.6578 |
| 0.8  | -0.3 | 1.3456 | 1.3132 |
| 0.9  | -0.3 | 0.6761 | 0.6679 |
| 1.0  | -0.3 | 0.3121 | 0.3183 |
| -1.0 | -0.2 | 0.1259 | 0.1303 |

|      |      |        |        |
|------|------|--------|--------|
| -0.9 | -0.2 | 0.0437 | 0.0451 |
| -0.8 | -0.2 | 0.0236 | 0.0235 |
| -0.7 | -0.2 | 0.0437 | 0.0451 |
| -0.6 | -0.2 | 0.1259 | 0.1303 |
| -0.5 | -0.2 | 0.3121 | 0.3183 |
| -0.4 | -0.2 | 0.6761 | 0.6679 |
| -0.3 | -0.2 | 1.3456 | 1.3132 |
| -0.2 | -0.2 | 1.2015 | 1.1732 |
| -0.1 | -0.2 | 0.6028 | 0.5896 |
| 0.0  | -0.2 | 0.2742 | 0.2783 |
| 0.1  | -0.2 | 0.0940 | 0.0981 |
| 0.2  | -0.2 | 0.0199 | 0.0205 |
| 0.3  | -0.2 | 0.0000 | 0.0000 |
| 0.4  | -0.2 | 0.0199 | 0.0205 |
| 0.5  | -0.2 | 0.0940 | 0.0981 |
| 0.6  | -0.2 | 0.2742 | 0.2783 |
| 0.7  | -0.2 | 0.6028 | 0.5896 |
| 0.8  | -0.2 | 1.2015 | 1.1732 |
| 0.9  | -0.2 | 1.3132 | 1.3132 |
| 1.0  | -0.2 | 0.6679 | 0.6679 |
| -1.0 | -0.1 | 0.3183 | 0.3183 |
| -0.9 | -0.1 | 0.1303 | 0.1303 |
| -0.8 | -0.1 | 0.0451 | 0.0451 |
| -0.7 | -0.1 | 0.0235 | 0.0235 |
| -0.6 | -0.1 | 0.0451 | 0.0451 |
| -0.5 | -0.1 | 0.1303 | 0.1303 |
| -0.4 | -0.1 | 0.3183 | 0.3183 |
| -0.3 | -0.1 | 0.6679 | 0.6679 |
| -0.2 | -0.1 | 1.3132 | 1.3132 |

|      |      |        |        |
|------|------|--------|--------|
| -0.1 | -0.1 | 1.6578 | 1.6578 |
| 0.0  | -0.1 | 0.8835 | 0.8835 |
| 0.1  | -0.1 | 0.4575 | 0.4575 |
| 0.2  | -0.1 | 0.2346 | 0.2346 |
| 0.3  | -0.1 | 0.1125 | 0.1125 |
| 0.4  | -0.1 | 0.0958 | 0.0958 |
| 0.5  | -0.1 | 0.1125 | 0.1125 |
| 0.6  | -0.1 | 0.2346 | 0.2346 |
| 0.7  | -0.1 | 0.4575 | 0.4575 |
| 0.8  | -0.1 | 0.8835 | 0.8835 |
| 0.9  | -0.1 | 1.6578 | 1.6578 |
| 1.0  | -0.1 | 2.3033 | 2.3033 |
| -1.0 | 0.0  | 1.3011 | 1.3011 |
| -0.9 | 0.0  | 0.7355 | 0.7355 |
| -0.8 | 0.0  | 0.4561 | 0.4561 |
| -0.7 | 0.0  | 0.2926 | 0.2926 |
| -0.6 | 0.0  | 0.2569 | 0.2569 |
| -0.5 | 0.0  | 0.2926 | 0.2926 |
| -0.4 | 0.0  | 0.4561 | 0.4561 |
| -0.3 | 0.0  | 0.7355 | 0.7355 |
| -0.2 | 0.0  | 1.3011 | 1.3011 |
| -0.1 | 0.0  | 2.3033 | 2.3033 |
| 0.0  | 0.0  | 3.2831 | 3.2831 |
| 0.1  | 0.0  | 1.9652 | 1.9652 |
| 0.2  | 0.0  | 1.1833 | 1.1833 |
| 0.3  | 0.0  | 0.8357 | 0.8357 |
| 0.4  | 0.0  | 0.6679 | 0.6679 |
| 0.5  | 0.0  | 0.6125 | 0.6125 |
| 0.6  | 0.0  | 0.6679 | 0.6679 |

|      |     |        |        |
|------|-----|--------|--------|
| 0.7  | 0.0 | 0.8357 | 0.8357 |
| 0.8  | 0.0 | 1.1833 | 1.1833 |
| 0.9  | 0.0 | 1.9652 | 1.9652 |
| 1.0  | 0.0 | 3.2831 | 3.2831 |
| -1.0 | 0.1 | 4.6571 | 4.6571 |
| -0.9 | 0.1 | 2.9177 | 2.9177 |
| -0.8 | 0.1 | 1.9980 | 1.9980 |
| -0.7 | 0.1 | 1.5577 | 1.5577 |
| -0.6 | 0.1 | 1.3468 | 1.3468 |
| -0.5 | 0.1 | 1.3014 | 1.3014 |
| -0.4 | 0.1 | 1.3468 | 1.3468 |
| -0.3 | 0.1 | 1.5577 | 1.5577 |
| -0.2 | 0.1 | 1.9980 | 1.9980 |
| -0.1 | 0.1 | 2.9177 | 2.9177 |
| 0.0  | 0.1 | 4.6571 | 4.6571 |
| 0.1  | 0.1 | 4.3033 | 4.6571 |
| 0.2  | 0.1 | 3.1167 | 2.9177 |
| 0.3  | 0.1 | 2.2100 | 1.9980 |
| 0.4  | 0.1 | 1.6813 | 1.5577 |
| 0.5  | 0.1 | 1.3664 | 1.3468 |
| 0.6  | 0.1 | 1.2583 | 1.3014 |
| 0.7  | 0.1 | 1.3664 | 1.3468 |
| 0.8  | 0.1 | 1.6813 | 1.5577 |
| 0.9  | 0.1 | 2.2100 | 1.9980 |
| 1.0  | 0.1 | 3.1167 | 2.9177 |
| -1.0 | 0.2 | 4.3033 | 4.6571 |
| -0.9 | 0.2 | 2.9533 | 3.2831 |
| -0.8 | 0.2 | 1.9548 | 1.9652 |
| -0.7 | 0.2 | 1.2275 | 1.1833 |

|      |     |        |        |
|------|-----|--------|--------|
| -0.6 | 0.2 | 0.8712 | 0.8357 |
| -0.5 | 0.2 | 0.6767 | 0.6679 |
| -0.4 | 0.2 | 0.5989 | 0.6125 |
| -0.3 | 0.2 | 0.6767 | 0.6679 |
| -0.2 | 0.2 | 0.8712 | 0.8357 |
| -0.1 | 0.2 | 1.2275 | 1.1833 |
| 0.0  | 0.2 | 1.9548 | 1.9652 |
| 0.1  | 0.2 | 2.9533 | 3.2831 |
| 0.2  | 0.2 | 2.1000 | 2.3033 |
| 0.3  | 0.2 | 1.2514 | 1.3011 |
| 0.4  | 0.2 | 0.7238 | 0.7355 |
| 0.5  | 0.2 | 0.4572 | 0.4561 |
| 0.6  | 0.2 | 0.2932 | 0.2926 |
| 0.7  | 0.2 | 0.2523 | 0.2569 |
| 0.8  | 0.2 | 0.2932 | 0.2926 |
| 0.9  | 0.2 | 0.4572 | 0.4561 |
| 1.0  | 0.2 | 0.7238 | 0.7355 |
| -1.0 | 0.3 | 1.2514 | 1.3011 |
| -0.9 | 0.3 | 2.1000 | 2.3033 |
| -0.8 | 0.3 | 1.6100 | 1.6578 |
| -0.7 | 0.3 | 0.8604 | 0.8835 |
| -0.6 | 0.3 | 0.4430 | 0.4575 |
| -0.5 | 0.3 | 0.2287 | 0.2346 |
| -0.4 | 0.3 | 0.1109 | 0.1125 |
| -0.3 | 0.3 | 0.0944 | 0.0958 |
| -0.2 | 0.3 | 0.1109 | 0.1125 |
| -0.1 | 0.3 | 0.2287 | 0.2346 |
| 0.0  | 0.3 | 0.4430 | 0.4575 |
| 0.1  | 0.3 | 0.8604 | 0.8835 |

|      |     |        |        |
|------|-----|--------|--------|
| 0.2  | 0.3 | 1.6100 | 1.6578 |
| 0.3  | 0.3 | 1.3456 | 1.3132 |
| 0.4  | 0.3 | 0.6761 | 0.6679 |
| 0.5  | 0.3 | 0.3121 | 0.3183 |
| 0.6  | 0.3 | 0.1259 | 0.1303 |
| 0.7  | 0.3 | 0.0437 | 0.0451 |
| 0.8  | 0.3 | 0.0236 | 0.0235 |
| 0.9  | 0.3 | 0.0437 | 0.0451 |
| 1.0  | 0.3 | 0.1259 | 0.1303 |
| -1.0 | 0.4 | 0.3121 | 0.3183 |
| -0.9 | 0.4 | 0.6761 | 0.6679 |
| -0.8 | 0.4 | 1.3456 | 1.3132 |
| -0.7 | 0.4 | 1.2015 | 1.1732 |
| -0.6 | 0.4 | 0.6028 | 0.5896 |
| -0.5 | 0.4 | 0.2742 | 0.2783 |
| -0.4 | 0.4 | 0.0940 | 0.0981 |
| -0.3 | 0.4 | 0.0199 | 0.0205 |
| -0.2 | 0.4 | 0.0000 | 0.0000 |
| -0.1 | 0.4 | 0.0199 | 0.0205 |
| 0.0  | 0.4 | 0.0940 | 0.0981 |
| 0.1  | 0.4 | 0.2742 | 0.2783 |
| 0.2  | 0.4 | 0.6028 | 0.5896 |
| 0.3  | 0.4 | 1.2015 | 1.1732 |
| 0.4  | 0.4 | 1.3132 | 1.3132 |
| 0.5  | 0.4 | 0.6679 | 0.6679 |
| 0.6  | 0.4 | 0.3183 | 0.3183 |
| 0.7  | 0.4 | 0.1303 | 0.1303 |
| 0.8  | 0.4 | 0.0451 | 0.0451 |
| 0.9  | 0.4 | 0.0235 | 0.0235 |

|      |     |        |        |
|------|-----|--------|--------|
| 1.0  | 0.4 | 0.0451 | 0.0451 |
| -1.0 | 0.5 | 0.1303 | 0.1303 |
| -0.9 | 0.5 | 0.3183 | 0.3183 |
| -0.8 | 0.5 | 0.6679 | 0.6679 |
| -0.7 | 0.5 | 1.3132 | 1.3132 |
| -0.6 | 0.5 | 1.6578 | 1.6578 |
| -0.5 | 0.5 | 0.8835 | 0.8835 |
| -0.4 | 0.5 | 0.4575 | 0.4575 |
| -0.3 | 0.5 | 0.2346 | 0.2346 |
| -0.2 | 0.5 | 0.1125 | 0.1125 |
| -0.1 | 0.5 | 0.0958 | 0.0958 |
| 0.0  | 0.5 | 0.1125 | 0.1125 |
| 0.1  | 0.5 | 0.2346 | 0.2346 |
| 0.2  | 0.5 | 0.4575 | 0.4575 |
| 0.3  | 0.5 | 0.8835 | 0.8835 |
| 0.4  | 0.5 | 1.6578 | 1.6578 |
| 0.5  | 0.5 | 2.3033 | 2.3033 |
| 0.6  | 0.5 | 1.3011 | 1.3011 |
| 0.7  | 0.5 | 0.7355 | 0.7355 |
| 0.8  | 0.5 | 0.4561 | 0.4561 |
| 0.9  | 0.5 | 0.2926 | 0.2926 |
| 1.0  | 0.5 | 0.2569 | 0.2569 |
| -1.0 | 0.6 | 0.2926 | 0.2926 |
| -0.9 | 0.6 | 0.4561 | 0.4561 |
| -0.8 | 0.6 | 0.7355 | 0.7355 |
| -0.7 | 0.6 | 1.3011 | 1.3011 |
| -0.6 | 0.6 | 2.3033 | 2.3033 |
| -0.5 | 0.6 | 3.2831 | 3.2831 |
| -0.4 | 0.6 | 1.9652 | 1.9652 |

|      |     |        |        |
|------|-----|--------|--------|
| -0.3 | 0.6 | 1.1833 | 1.1833 |
| -0.2 | 0.6 | 0.8357 | 0.8357 |
| -0.1 | 0.6 | 0.6679 | 0.6679 |
| 0.0  | 0.6 | 0.6125 | 0.6125 |
| 0.1  | 0.6 | 0.6679 | 0.6679 |
| 0.2  | 0.6 | 0.8357 | 0.8357 |
| 0.3  | 0.6 | 1.1833 | 1.1833 |
| 0.4  | 0.6 | 1.9652 | 1.9652 |
| 0.5  | 0.6 | 3.2831 | 3.2831 |
| 0.6  | 0.6 | 4.6571 | 4.6571 |
| 0.7  | 0.6 | 2.9177 | 2.9177 |
| 0.8  | 0.6 | 1.9980 | 1.9980 |
| 0.9  | 0.6 | 1.5577 | 1.5577 |
| 1.0  | 0.6 | 1.3468 | 1.3468 |
| -1.0 | 0.7 | 1.3014 | 1.3014 |
| -0.9 | 0.7 | 1.3468 | 1.3468 |
| -0.8 | 0.7 | 1.5577 | 1.5577 |
| -0.7 | 0.7 | 1.9980 | 1.9980 |
| -0.6 | 0.7 | 2.9177 | 2.9177 |
| -0.5 | 0.7 | 4.6571 | 4.6571 |
| -0.4 | 0.7 | 4.3033 | 4.6571 |
| -0.3 | 0.7 | 3.1167 | 2.9177 |
| -0.2 | 0.7 | 2.2100 | 1.9980 |
| -0.1 | 0.7 | 1.6813 | 1.5577 |
| 0.0  | 0.7 | 1.3664 | 1.3468 |
| 0.1  | 0.7 | 1.2583 | 1.3014 |
| 0.2  | 0.7 | 1.3664 | 1.3468 |
| 0.3  | 0.7 | 1.6813 | 1.5577 |
| 0.4  | 0.7 | 2.2100 | 1.9980 |



|      |     |        |        |
|------|-----|--------|--------|
| 0.5  | 0.7 | 3.1167 | 2.9177 |
| 0.6  | 0.7 | 4.3033 | 4.6571 |
| 0.7  | 0.7 | 2.9533 | 3.2831 |
| 0.8  | 0.7 | 1.9548 | 1.9652 |
| 0.9  | 0.7 | 1.2275 | 1.1833 |
| 1.0  | 0.7 | 0.8712 | 0.8357 |
| -1.0 | 0.8 | 0.6767 | 0.6679 |
| -0.9 | 0.8 | 0.5989 | 0.6125 |
| -0.8 | 0.8 | 0.6767 | 0.6679 |
| -0.7 | 0.8 | 0.8712 | 0.8357 |
| -0.6 | 0.8 | 1.2275 | 1.1833 |
| -0.5 | 0.8 | 1.9548 | 1.9652 |
| -0.4 | 0.8 | 2.9533 | 3.2831 |
| -0.3 | 0.8 | 2.1000 | 2.3033 |
| -0.2 | 0.8 | 1.2514 | 1.3011 |
| -0.1 | 0.8 | 0.7238 | 0.7355 |
| 0.0  | 0.8 | 0.4572 | 0.4561 |
| 0.1  | 0.8 | 0.2932 | 0.2926 |
| 0.2  | 0.8 | 0.2523 | 0.2569 |
| 0.3  | 0.8 | 0.2932 | 0.2926 |
| 0.4  | 0.8 | 0.4572 | 0.4561 |
| 0.5  | 0.8 | 0.7238 | 0.7355 |
| 0.6  | 0.8 | 1.2514 | 1.3011 |
| 0.7  | 0.8 | 2.1000 | 2.3033 |
| 0.8  | 0.8 | 1.6100 | 1.6578 |
| 0.9  | 0.8 | 0.8604 | 0.8835 |
| 1.0  | 0.8 | 0.4430 | 0.4575 |
| -1.0 | 0.9 | 0.2287 | 0.2346 |
| -0.9 | 0.9 | 0.1109 | 0.1125 |

|      |     |        |        |
|------|-----|--------|--------|
| -0.8 | 0.9 | 0.0944 | 0.0958 |
| -0.7 | 0.9 | 0.1109 | 0.1125 |
| -0.6 | 0.9 | 0.2287 | 0.2346 |
| -0.5 | 0.9 | 0.4430 | 0.4575 |
| -0.4 | 0.9 | 0.8604 | 0.8835 |
| -0.3 | 0.9 | 1.6100 | 1.6578 |
| -0.2 | 0.9 | 1.3456 | 1.3132 |
| -0.1 | 0.9 | 0.6761 | 0.6679 |
| 0.0  | 0.9 | 0.3121 | 0.3183 |
| 0.1  | 0.9 | 0.1259 | 0.1303 |
| 0.2  | 0.9 | 0.0437 | 0.0451 |
| 0.3  | 0.9 | 0.0236 | 0.0235 |
| 0.4  | 0.9 | 0.0437 | 0.0451 |
| 0.5  | 0.9 | 0.1259 | 0.1303 |
| 0.6  | 0.9 | 0.3121 | 0.3183 |
| 0.7  | 0.9 | 0.6761 | 0.6679 |
| 0.8  | 0.9 | 1.3456 | 1.3132 |
| 0.9  | 0.9 | 1.2015 | 1.1732 |
| 1.0  | 0.9 | 0.6028 | 0.5896 |
| -1.0 | 1.0 | 0.2742 | 0.2783 |
| -0.9 | 1.0 | 0.0940 | 0.0981 |
| -0.8 | 1.0 | 0.0199 | 0.0205 |
| -0.7 | 1.0 | 0.0000 | 0.0000 |
| -0.6 | 1.0 | 0.0199 | 0.0205 |
| -0.5 | 1.0 | 0.0940 | 0.0981 |
| -0.4 | 1.0 | 0.2742 | 0.2783 |
| -0.3 | 1.0 | 0.6028 | 0.5896 |
| -0.2 | 1.0 | 1.2015 | 1.1732 |
| -0.1 | 1.0 | 1.3132 | 1.3132 |

|     |     |        |        |
|-----|-----|--------|--------|
| 0.0 | 1.0 | 0.6679 | 0.6679 |
| 0.1 | 1.0 | 0.3183 | 0.3183 |
| 0.2 | 1.0 | 0.1303 | 0.1303 |
| 0.3 | 1.0 | 0.0451 | 0.0451 |
| 0.4 | 1.0 | 0.0235 | 0.0235 |
| 0.5 | 1.0 | 0.0451 | 0.0451 |
| 0.6 | 1.0 | 0.1303 | 0.1303 |
| 0.7 | 1.0 | 0.3183 | 0.3183 |
| 0.8 | 1.0 | 0.6679 | 0.6679 |
| 0.9 | 1.0 | 1.3132 | 1.3132 |
| 1.0 | 1.0 | 1.6578 | 1.6578 |
